# Supplementary material
Source: HighWire-hosted journal article supplement (https://openres.ersjournals.com/content/8/1/00535-2021)
Supplement: inline-supplementary-material-1 [file inline-supplementary-material-1.pdf]

**Table S1** List of SKS, ICD-8 and -10 codes that are possibly related to an arterial puncture, as selected by two clinical physicians and categorised by three independent blinded surgeons

| Code                                                                          | Very likely | Possible but unlikely | Not possible |
|-------------------------------------------------------------------------------|-------------|-----------------------|--------------|
| 44299 – Aneurysm arteria aliud                                                | X           |                       | XX           |
| 44441 – Embolism, thrombosis arteria femoralis                                | X           |                       | XX           |
| 44442 - Embolism, thrombosis arteria popliteae                                | X           |                       | XX           |
| 44444 - Embolism, thrombosis arteria periphericae extremitatis                | X           |                       | XX           |
| 68229 - Inflammation, abscess and acute lymphangioma. brachii and antebrachii | X           |                       | XX           |
| 95209 – Traumatic lesion plexus brachialis and nervi brachii, uncomplicated   | X           |                       | XX           |
| DG560 – Carpal tunnel syndrome                                                |             | X                     | XX           |
| DG562 – Neuropathy in nervus ulnaris                                          |             |                       | XXX          |
| DI721 – Aneurism upper extremity                                              | X X         |                       | X            |
| DI721 – Aneurism in artery in upper extremity                                 | X           | X                     | X            |
| DI724 - Aneurism in artery in lower extremity                                 | X X         |                       | X            |
| DI729 - Aneurism unspecified                                                  | X X         |                       | X            |
| DI742 – Embolism or thrombosis in artery in upper extremity                   | X X         |                       | X            |
| DI742A - Embolism or thrombosis in upper extremity                            | X           | X                     | X            |
| DI742A - Emboli arteria brachialis                                            | X           | X                     | X            |
| DI742B - Thrombosis in artery in upper extremity                              | X X         |                       | X            |
| DI742B - Thrombosis arteria brachialis                                        | X X         |                       | X            |
| DI743 - Embolism or thrombosis in artery in lower extremity                   | X X         |                       | X            |
| DI743A - Embolism in artery in lower extremity                                | X           | X                     | X            |
| DI743B - Thrombosis in artery in lower extremity                              | X X         |                       | X            |
| DI744 - Embolism or thrombosis in artery in unspecified extremity             | X           |                       | XX           |
| DI748 – Embolism or thrombosis in other artery                                |             | X                     | XX           |
| DI749 - Embolism or thrombosis in artery unspecified                          | X           |                       | XX           |
| DI770 - Acquired A-V fistula                                                  | X X         |                       | X            |
| DI771 – Artery stricture                                                      | X           | X                     | X            |
| DI771 – Stricture of artery                                                   | X           |                       | XX           |
| DI772 – Artery rupture                                                        |             |                       | XXX          |
| DI775 – Artery necrosis                                                       |             | X                     | XX           |
| DI803A – Embolism in lower extremity unspecified                              |             | X                     | XX           |
| DM622A – Non-traumatic compartment syndrome                                   |             |                       | XXX          |
| DS451 – Lesion of arteria brachialis                                          | X X         |                       | X            |
| DS540 - Lesion of nervus ulnaris in elbow region or lower arm                 |             | X                     | XX           |
| DS541 – Lesion of nervus medianus in elbow region or lower arm                | X           | X                     | X            |
| DS542 - Lesion of nervus radialis in elbow region or lower arm                | X           |                       | XX           |

|                                                                                  |       |     |     |
|----------------------------------------------------------------------------------|-------|-----|-----|
| DS550 - Lesion of nervus ulnaris in elbow region or lower arm                    | X X   | X   |     |
| DS551 – Lesion of arteria radialis in elbow region or lower arm                  | X X X |     |     |
| DS561 – Lesion of muscle/tendon of long flexor to a finger on lower arm          |       | X   | XX  |
| DS562 – Lesion of muscle or tendon of other flexor on lower arm                  |       | X   | XX  |
| DS568 – Lesion of an or unspecified muscle or tendon in elbow/lower arm          |       | X   | XX  |
| DS641 – Lesion of nervus medianus in wrist or hand                               | X     | X   | X   |
| DS659 – Lesion of blood vessel in wrist or hand unspecified                      | X X   |     | X   |
| DS660 – Lesion of long flexors to thumb in wrist/hand                            |       | X   | XX  |
| DS661 – Lesion of flexors to unspecified finger in wrist or hand                 |       | X   | XX  |
| DS750 – Lesion in arteria femoralis                                              | X     |     | XX  |
| DT145 – Lesion in blood vessel without indication of body region                 | X     | X   | X   |
| DT801 – Complication in vessel after infusion, transfusion on injection          | X X   |     | X   |
| DT802 - Infection after infusion, transfusion or injection                       | X X   |     | X   |
| DT808 – Other complication after infusion, transfusion or injection              | X X   |     | X   |
| DT809 – Complication after infusion, transfusion or injection unspecified        | X X   |     | X   |
| DT812K - Inadverted preoperative puncture/lesion of vein or lymph system         | X     | X   | X   |
| DT814 – Infection after intervention unspecified                                 |       | X X | X   |
| DT817 – Complication in vessel after intervention unspecified                    | X     | X X |     |
| DT817B – Thromboembolic complication unspecified                                 |       | X X | X   |
| DT817K - Thrombosis, embolism or necrosis after vessel operation                 |       |     | XXX |
| DT819 – Complication of procedure unspecified                                    |       | X   | XX  |
| DT88 – Complications with or with surgery                                        | X     | X   | X   |
| DT888 – Complication with surgery or with unspecified treatment, other specified | X     | X X |     |
| KACA11 - Exploration, n. medianus                                                |       | X   | XX  |
| KACA13 - Exploration, n. ulnaris                                                 |       | X   | XX  |
| KACC51 - Decompression and loosening of nervus medianus                          |       | X X | X   |
| KACC53 - Decompression and loosening of nervus ulnaris                           |       | X X | X   |
| KNCA00 - Exploration in soft tissue in lower arm, percutaneous                   |       | X   | XX  |

|                                                                                         |  |     |     |
|-----------------------------------------------------------------------------------------|--|-----|-----|
| KNCA02 - Exploration in soft tissue in lower arm, open                                  |  | X   | XX  |
| KNCM09 – Fasciotomy in lower arm                                                        |  | X X | X   |
| KNCM19 – Resection or excision of fasciae in lower arm                                  |  |     | XXX |
| KNCM99 – Operation on fasciae, tendons, ganglion, bursa, elbow/lower arm, other         |  |     | XXX |
| KNCS09 - Incision/revision of infection in tendon in elbow/lower arm                    |  | X   | XX  |
| KNCS99 – Operation for infection in tendons, joints and bones, elbow / lower arm, other |  | X   | XX  |
| KNDA02 - Exploration of soft tissue, wrist and hand, open                               |  | X   | XX  |
| KNDM09 - Fasciotomy of wrist/hand                                                       |  |     | XXX |
| KNDM19 - Fasciotomy partial/total (incl. op pro mb. Dupuytren)                          |  | X   | XX  |
| KNDS09 - Incision/revision of infection in tendon in wrist/hand                         |  | X   | XX  |
| KNDS99 – Other operation for infection in tendon, joint or bone in wrist/hand           |  | X   | XX  |
| KQCA00 – Puncture of skin in upper extremity                                            |  |     | XXX |
| KQCA10 - Incision of skin in upper extremity                                            |  |     | XXX |
| KQCA99 - Incision of skin in upper extremity, other                                     |  |     | XXX |
| KQCB00 – Suture of skin in upper extremity                                              |  |     | XXX |
| KQCB05 – Wound revision in upper extremity                                              |  | X   | XX  |
| KQCB10 – Replacement of larger wounds in upper extremity                                |  | X   | XX  |
| KQCB99 – Wound treatment in upper extremity, other                                      |  | X   | XX  |
| KTNC00 – Puncture or needle biopsy in elbow/lower arm                                   |  | X   | XX  |
| KTNC05 - Minor incision or soft tissue in elbow/lower arm                               |  | X   | XX  |
| KTND00 – Puncture or needle biopsy in wrist/hand                                        |  | X X | X   |
| KTND05 - Minor incision of soft tissue in wrist/hand                                    |  | X   | XX  |

**Table S2** List of SKS, ICD-8 and -10 codes that were registered in patients that had a complication after an AP, categorised into five categories

| <b>Code</b> |                                                                          | <b>Category</b>        |
|-------------|--------------------------------------------------------------------------|------------------------|
| DI742       | Embolism or thrombosis in artery in upper extremity                      | Embolism or Thrombosis |
| DI743       | Embolism or thrombosis in artery in lower extremity                      | Embolism or Thrombosis |
| DI743A      | Embolism in artery in lower extremity                                    | Embolism or Thrombosis |
| DI743B      | Thrombosis in artery in lower extremity                                  | Embolism or Thrombosis |
| DI744       | Embolism or thrombosis in artery in unspecified extremity                | Embolism or Thrombosis |
| DI749       | Embolism or thrombosis in artery unspecified                             | Embolism or Thrombosis |
| 44441       | Embolism, thrombosis arteria femoralis                                   | Embolism or Thrombosis |
| 44442       | Embolism, thrombosis arteria popliteae                                   | Embolism or Thrombosis |
| 44444       | Embolism, thrombosis arteria periphericae extremitatis                   | Embolism or Thrombosis |
| DI721       | Aneurism upper extremity                                                 | Aneurysm               |
| DI721       | Aneurism in artery in upper extremity                                    | Aneurysm               |
| DI724       | Aneurism in artery in lower extremity                                    | Aneurysm               |
| DI729       | Aneurism unspecified                                                     | Aneurysm               |
| 44299       | Aneurysm arteria aliud                                                   | Aneurysm               |
| DS541       | Lesion of nervus medianus in elbow region or lower arm                   | Nerve damage           |
| DS641       | Lesion of nervus medianus in wrist or hand                               | Nerve damage           |
| DI770       | Acquired A-V fistula                                                     | Arteriovenous fistulas |
| DS550       | Lesion of nervus ulnaris in elbow region or lower arm                    | Other                  |
| DS750       | Lesion in arteria femoralis                                              | Other                  |
| DT145       | Lesion in blood vessel without indication of body region                 | Other                  |
| DT801       | Complication in vessel after infusion, transfusion on injection          | Other                  |
| DT808       | Other complication after infusion, transfusion or injection              | Other                  |
| DT809       | Complication after infusion, transfusion or injection unspecified        | Other                  |
| DT812K      | Inadverted preoperative puncture/lesion of vein or lymph system          | Other                  |
| DT817       | Complication in vessel after intervention unspecified                    | Other                  |
| DT88        | Complications with or with surgery                                       | Other                  |
| DT888       | Complication with surgery or with unspecified treatment, other specified | Other                  |
| 68229       | Inflammation, abscess and acute lymphangioma. brachii and antebrachii    | Other                  |
